# Supplementary material
Source: PubMed Central journal article supplement (PMC2788864)

Supplementary Table 1. Strains and plasmids used in this study.

| Strain and Plasmid                      | Relevant characteristics                                                                                                                                                                                                                      | Source or reference |
|-----------------------------------------|-----------------------------------------------------------------------------------------------------------------------------------------------------------------------------------------------------------------------------------------------|---------------------|
| <b>Strains</b>                          |                                                                                                                                                                                                                                               |                     |
| <i>E. coli</i>                          |                                                                                                                                                                                                                                               |                     |
| DH5 $\alpha$                            | <i>supE44</i> , $\Delta$ <i>lacU169</i> ( $\phi$ 80 <i>lacZ</i> $\Delta$ M15), <i>HsdR17</i> ,<br><i>recA1</i> , <i>endA1</i> , <i>gyrA96</i> , <i>relA1</i>                                                                                  |                     |
| BL21(DE3) CodonPlus RIL                 | <i>E. coli</i> B F <sup>-</sup> <i>ompT hsdS</i> (r <sub>B</sub> <sup>-</sup> m <sub>B</sub> <sup>-</sup> ) <i>dcm</i> <sup>+</sup> Tet <sup>r</sup> <i>gal</i><br>$\lambda$ (DE3) <i>endA</i> Hte ( <i>argU ileY leuW Cam</i> <sup>r</sup> ) |                     |
| <i>T. kodakaraensis</i>                 |                                                                                                                                                                                                                                               |                     |
| KOD1                                    |                                                                                                                                                                                                                                               | (8, 9)              |
| KUW1                                    | $\Delta$ <i>pyrF</i> , $\Delta$ <i>trpE</i>                                                                                                                                                                                                   | (12)                |
| $\Delta$ TK2141 ( $\Delta$ <i>pok</i> ) | KUW1 $\Delta$ TK2141                                                                                                                                                                                                                          | This study          |
| $\Delta$ TK1686 ( $\Delta$ <i>pps</i> ) | KUW1 $\Delta$ TK1686                                                                                                                                                                                                                          | This study          |
| ETK0939                                 | KUW1 P <sub>TK0939</sub> ::P <sub>csg</sub> ::TK0939                                                                                                                                                                                          | This study          |
| ETK2141                                 | KUW1 $\Delta$ <i>chiA</i> ::TK2141 overexpression<br>cassette (P <sub>csg</sub> ::TK2141)                                                                                                                                                     | This study          |
| <b>Plasmids</b>                         |                                                                                                                                                                                                                                               |                     |
| pUC118                                  | Amp <sup>r</sup> general cloning vector                                                                                                                                                                                                       | Takara              |
| pET-21a(+)                              | Amp <sup>r</sup> general expression vector in<br><i>E. coli</i>                                                                                                                                                                               | Novagen             |
| pET-TK0939                              | pET-21a(+) derivative; TK0939                                                                                                                                                                                                                 | This study          |
| pET-TK1473                              | pET-21a(+) derivative; TK1473                                                                                                                                                                                                                 | This study          |
| pET-TK2141                              | pET-21a(+) derivative; TK2141                                                                                                                                                                                                                 | This study          |
| pET-TK2242                              | pET-21a(+) derivative; TK2242                                                                                                                                                                                                                 | This study          |
| pET-TK1686                              | pET-21a(+) derivative; TK1686                                                                                                                                                                                                                 | This study          |
| pET- <i>EccoA</i>                       | pET-21a(+) derivative; <i>EccoA</i>                                                                                                                                                                                                           | This study          |
| pUD3                                    | pUC118 derivative; <i>pyrF</i> marker cassette<br>(P <sub>pyrF</sub> :: <i>pyrF</i> )                                                                                                                                                         | This study          |
| pUD3-TK0939                             | pUD3 derivative; P <sub>csg</sub> ::TK0939:: <i>pyrF</i>                                                                                                                                                                                      | This study          |
| pUD3-TK2141                             | pUD3 derivative; $\Delta$ <i>chiA</i> ::TK2141<br>overexpression cassette (P <sub>csg</sub> ::TK2141):: <i>pyrF</i>                                                                                                                           | This study          |
| pUD3- $\Delta$ <i>pok</i>               | pUD3 derivative; $\Delta$ <i>pok</i> cassette:: <i>pyrF</i>                                                                                                                                                                                   | This study          |
| pUD3- $\Delta$ <i>pps</i>               | pUD3 derivative; $\Delta$ <i>pps</i> cassette:: <i>pyrF</i>                                                                                                                                                                                   | This study          |

Supplementary Table 2. Primers used in this study.

| Primer names                                                            | Primer sequences                                          |
|-------------------------------------------------------------------------|-----------------------------------------------------------|
| Construction of plasmids for gene expression in <i>E. coli</i>          |                                                           |
| TK0939EF                                                                | 5'- TGGTGAGCATAT <b>ATG</b> ATAGTGCACGCTAGGA -3'          |
| TK0939ER                                                                | 5'- GCTCCAG <b>GATCCT</b> CACTGACCACCGGC -3'              |
| TK1473F                                                                 | 5'- AGGTGGACATAT <b>ATG</b> ATACTCATCAAGATCGGCGGT -3'     |
| TK1473R                                                                 | 5'- CGAACAGAAT <b>CTCACCTCAGCCTCGTTCCGA</b> -3'           |
| TK2141EF                                                                | 5'- GGTGAACATAT <b>ATG</b> CTCATCAGGGCGTTTATTCC -3'       |
| TK2141ER                                                                | 5'- AAGGGTGAAT <b>CTTACCCGACCCAGCGCCCGA</b> -3'           |
| TK2242F                                                                 | 5'- GGTGAGGCATAT <b>ATG</b> GATTCGATCAGAATCAAAG -3'       |
| TK2242R                                                                 | 5'- ATACCAG <b>GATCCTTA</b> ACCATCCAGCACCACCA -3'         |
| TK1686F                                                                 | 5'- AGGTGATCATAT <b>ATG</b> GTGAACATCCCGAAGAGT -3'        |
| TK1686R                                                                 | 5'- AAAGGAGAAT <b>CTTCACTCAAGCTCCTTTCTCCT</b> -3'         |
| <i>EccoaAF</i>                                                          | 5'- GATAGACATATGCACCACCACCACCACATGAGTATAAAAAGAGCAAACG-3'  |
| <i>EccoaAR</i>                                                          | 5'- CTC <b>CCCGGATCCTT</b> ATTGCGTAGTCTGACCT-3'           |
| Construction of plasmids for gene expression in <i>T. kodakaraensis</i> |                                                           |
| TK0939TF1                                                               | 5'- TGGGATCC <b>CTCGTCACGAGTCTCGGCTACC</b> -3'            |
| TK0939TR1                                                               | 5'- CAGGATCC <b>CACTGACCACCGCGACGCT</b> -3'               |
| TK0939TF2                                                               | 5'- <i>CACCACCACCACCACCGTGATAGTGCACGCC</i> -3'            |
| TK0939TR2                                                               | 5'- <i>TTTCTCACCACCATAGAAGCAAAGAAG</i> -3'                |
| P <sub>csG</sub> F1                                                     | 5'- <i>TATCGGCAAAAAGGCGAATTATGTGTAGGCA</i> -3'            |
| P <sub>csG</sub> R                                                      | 5'- <i>GTGGTGGTGGTGGTGGTGCATATGACAACACCTCCTTGGGTT</i> -3' |
| TK2141TF                                                                | 5'- AAAAACATATGCACCACCACCACCACATGCTCATCAGGGCGT -3'        |
| TK2141TR                                                                | 5'- <i>CTACCCGACCCAGCGCCCGACCT</i> -3'                    |
| <i>chiATF1</i>                                                          | 5'- <i>GCGCTGGGTGGGTAGCCCTCTTCTCCTCTTT</i> -3'            |
| <i>chiATR1</i>                                                          | 5'- AAAAGGATCC <b>CTCTGAGCCCTGGAGAAGGGGG</b> -3'          |
| <i>chiATF2</i>                                                          | 5'- AAAAGAAT <b>TCAGAACCTTATTCCTTCTGCAT</b> -3'           |
| <i>chiATR2</i>                                                          | 5'- <i>GCCGATAACACAACACCCCTTGAGCTTTGAAT</i> -3'           |
| P <sub>csG</sub> F2                                                     | 5'- <i>GTTGTGTATCGGCAAAAAGGCGAATTATGTGT</i> -3'           |
| Construction of plasmids for gene disruption in <i>T. kodakaraensis</i> |                                                           |
| TK2141DF1                                                               | 5'- AAGGATCCA <b>ACCGACCTTGGCGCTCCACA</b> -3'             |
| TK2141DR1                                                               | 5'- AAGGATCC <b>ACGTATTGGAAGGGCCTTGGCCG</b> -3'           |
| TK2141DF2                                                               | 5'- <b>CCCGCTACCCTTTTATTCTCCTTGC</b> -3'                  |
| TK2141DR2                                                               | 5'- <b>GCTTTCACCCAGAATTGTTCAGA</b> -3'                    |
| TK1686DF1                                                               | 5'- <b>GGGGATCCTGCTCGGCAAAGCGGGAGTC</b> -3'               |
| TK1686DR1                                                               | 5'- <b>GCGGATCCCAGATGAACGTCTTAAAC</b> -3'                 |
| TK1686DF2                                                               | 5'- <b>AGCCTTTCCTTTTGTACCTTTTGT</b> -3'                   |
| TK1686DR2                                                               | 5'- <b>ACTATCACCTGCTCACAGTTTGCTG</b> -3'                  |
| Examination of gene disruption                                          |                                                           |
| TK2141CF                                                                | 5'- <b>TTACTGTGGCGAGCATAGGTGCAGT</b> -3'                  |
| TK2141CR                                                                | 5'- <b>CTTCCGAGGATTAGGTATGGAA</b> -3'                     |
| TK1686CF                                                                | 5'- <b>ACAGTGCACCACCTCGAACACGTGA</b> -3'                  |
| TK1686CR                                                                | 5'- <b>TGCCGTAGTCAGTGCCCTTGAGAA</b> -3'                   |

Underlined sequences correspond to those found in the *T.kodakaraensis* genome sequence. Bold sequences represent restriction enzyme sites.

Italic sequences are regions used to connect DNA fragments via fusion PCR.

Legend to Supplementary Fig. 1.

Supplementary Fig. 1. The plasmid and recombination strategies to construct the over-expression strains of TK0939 (A) and TK2141 (B). *T. kodakaraensis* KUW1 ( $\Delta pyrF$ ,  $\Delta trpE$ ) was used as the host strain. A strong, constitutive promoter ( $P_{csg}$ ) and a His-Tag sequence was incorporated into the plasmids. Cells that had undergone the initial single crossover insertion were enriched by growing cells in medium without uracil. Cells that had undergone the second, pop-out recombination were selected with resistance towards 5-FOA.

# SUPPLEMENTARY FIGURE 1

(A)

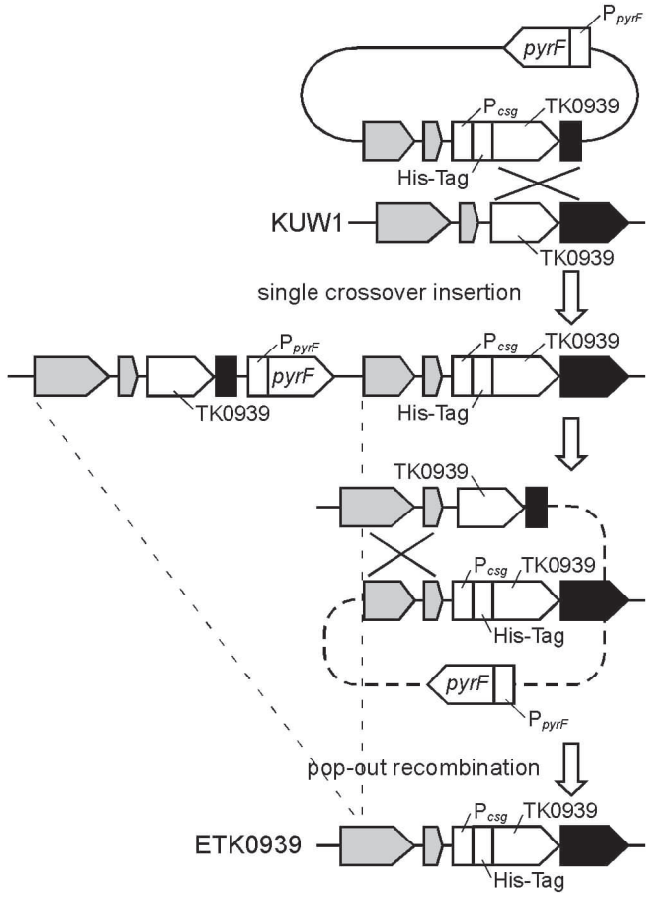

(B)

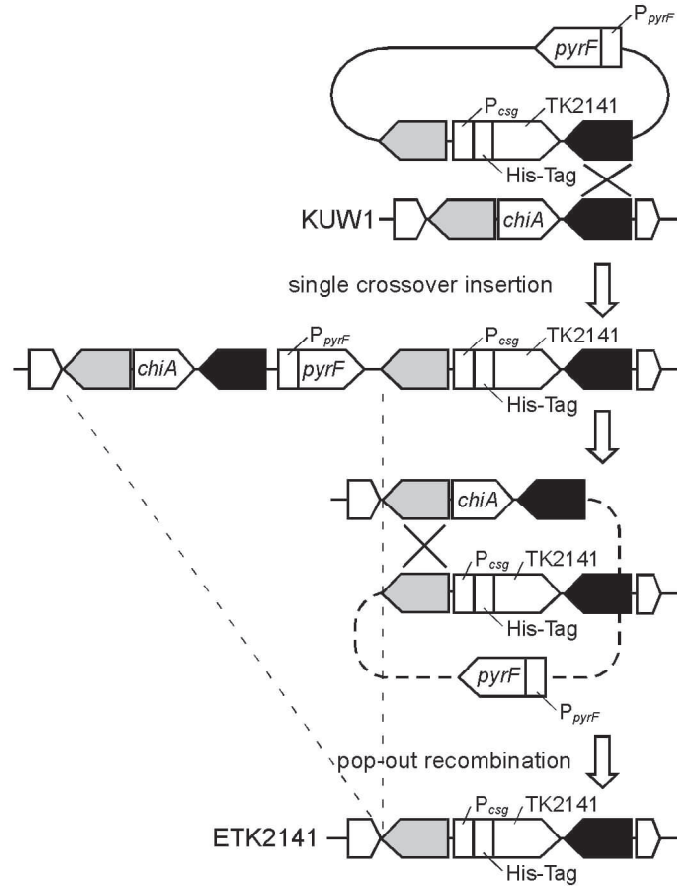

Supplement: supp_M109.009696_jbc.M109.009696-1.pdf [file supp_M109.009696_jbc.M109.009696-1.pdf]
